# Supplementary material for: Sarcopenia Is Associated with Cognitive Impairment Mainly Due to Slow Gait Speed: Results from the Korean Frailty and Aging Cohort Study (KFACS)
Source: PubMed Central journal article supplement (PMC6539557; doi:10.3390/ijerph16091491), 2019-04-27
Supplement: ijerph-16-01491-s001.pdf [file ijerph-16-01491-s001.pdf]

**Supplementary data**

**Table S1. Associations of body composition index, muscle strength, and muscle function with neuropsychological test scores**

| Dependent variable                                                                     |                                      | Male                         |                 |         | Female                       |                 |         |
|----------------------------------------------------------------------------------------|--------------------------------------|------------------------------|-----------------|---------|------------------------------|-----------------|---------|
|                                                                                        |                                      | <i>Adjusted Model 3</i><br>B | 95% CI          | p-value | <i>Adjusted Model 3</i><br>B | 95% CI          | p-value |
| <i>Appendicular skeletal muscle mass index, kg/h<sup>2</sup> (adjusted for height)</i> | Mini-Mental State Examination, score | -0.174                       | -0.394, 0.046   | .212    | -0.030                       | -0.296, 0.236   | .822    |
|                                                                                        | Word list learning, score            | 0.036                        | -0.293, 0.365   | .831    | 0.479                        | 0.094, 0.863    | .015    |
|                                                                                        | Word list recall, score              | 0.030                        | -0.140, 0.199   | .732    | 0.197                        | 0.000, 0.394    | .049    |
|                                                                                        | Word list recognition, score         | -0.060                       | -0.215, 0.094   | .446    | 0.157                        | -0.023, 0.336   | .087    |
|                                                                                        | Trail making test A, s               | 1.060                        | -1.803, 3.922   | .468    | 2.337                        | -2.880, 7.554   | .379    |
|                                                                                        | Digit span forward, score            | 0.023                        | -0.098, 0.144   | .741    | 0.083                        | -0.056, 0.222   | .242    |
|                                                                                        | Digit span backward, score           | -0.076                       | -0.163, 0.010   | .084    | -0.026                       | -0.122, 0.069   | .588    |
|                                                                                        | Frontal Assessment Battery, score    | -0.205                       | -0.414, 0.003   | .054    | -0.215                       | -0.463, 0.032   | .088    |
| <i>Appendicular skeletal muscle mass index, kg/BMI (adjusted for body mass index)</i>  | Mini-Mental State Examination, score | -1.246                       | -2.828, 0.336   | .123    | -0.016                       | -2.451, 2.419   | .990    |
|                                                                                        | Word list learning, score            | -2.211                       | -4.568, 0.145   | .066    | 0.517                        | -3.016, 4.050   | .774    |
|                                                                                        | Word list recall, score              | -0.650                       | -1.870, 0.570   | .296    | 0.521                        | -1.285, 2.327   | .572    |
|                                                                                        | Word list recognition, score         | -0.814                       | -1.925, 0.298   | .151    | -1.146                       | -1.791, 1.499   | .862    |
|                                                                                        | Trail making test A, s               | -0.687                       | -21.292, 19.918 | .948    | 15.547                       | -35.240, 63.334 | .523    |
|                                                                                        | Digit span forward, score            | 0.637                        | -0.231, 1.504   | .150    | 1.040                        | -0.233, 2.312   | .109    |
|                                                                                        | Digit span backward, score           | -0.086                       | -1.709, 0.537   | .788    | 0.072                        | -0.802, 0.947   | .871    |
|                                                                                        | Frontal Assessment Battery, score    | -0.184                       | -1.688, 1.320   | .810    | -1.302                       | -3.571, 0.967   | .260    |
| <i>Body fat percentage, %<sup>a</sup></i>                                              | Mini-Mental State Examination, score | 0.039                        | 0.007, 0.071    | .018    | 0.046                        | 0.009, 0.082    | .014    |
|                                                                                        | Word list learning, score            | 0.087                        | 0.039, 0.134    | .000    | 0.036                        | -0.017, 0.089   | .179    |
|                                                                                        | Word list recall, score              | 0.030                        | 0.005, 0.055    | .018    | 0.020                        | -0.007, 0.046   | .156    |
|                                                                                        | Word list recognition, score         | 0.024                        | 0.001, 0.047    | .037    | 0.029                        | 0.005, 0.054    | .019    |
|                                                                                        | Trail making test A, s               | -0.468                       | -0.886, -0.046  | .029    | -1.834                       | -2.538, -1.130  | .000    |
|                                                                                        | Digit span forward, score            | -0.017                       | -0.035, 0.001   | .060    | -0.018                       | -0.037, 0.001   | .062    |
|                                                                                        | Digit span backward, score           | 0.019                        | 0.006, 0.032    | .003    | 0.011                        | -0.002, 0.024   | .099    |
|                                                                                        | Frontal Assessment Battery, score    | 0.019                        | -0.011, 0.050   | .218    | 0.052                        | 0.018, 0.085    | .003    |
| <i>Grip strength, kg</i>                                                               | Mini-Mental State Examination, score | 0.047                        | 0.017, 0.078    | .002    | 0.043                        | -0.004, 0.090   | .076    |
|                                                                                        | Word list learning, score            | 0.057                        | 0.012, 0.103    | .013    | 0.038                        | -0.031, 0.106   | .760    |
|                                                                                        | Word list recall, score              | 0.015                        | -0.009, 0.039   | .214    | 0.026                        | -0.009, 0.061   | .151    |
|                                                                                        | Word list recognition, score         | 0.016                        | -0.005, 0.038   | .132    | 0.022                        | -0.101, 0.054   | .181    |

|                              |                                      |         |                 |      |         |                  |      |
|------------------------------|--------------------------------------|---------|-----------------|------|---------|------------------|------|
|                              | Trail making test A, s               | -0.831  | -0.226, -0.437  | .000 | -0.592  | -1.521, 0.336    | .211 |
|                              | Digit span forward, score            | -0.003  | -0.020, 0.014   | .730 | -0.011  | -0.036, 0.014    | .374 |
|                              | Digit span backward, score           | 0.004   | -0.008, 0.014   | .503 | 0.018   | 0.001, 0.035     | .041 |
|                              | Frontal Assessment Battery, score    | 0.058   | 0.030, 0.087    | .000 | 0.045   | 0.001, 0.089     | .044 |
| <i>Usual gait speed, m/s</i> | Mini-Mental State Examination, score | 0.714   | 0.061, 1.366    | .032 | 1.010   | 0.201, 1.819     | .014 |
|                              | Word list learning, score            | 1.371   | 0.401, 2.341    | .006 | 2.228   | 1.059, 3.397     | .000 |
|                              | Word list recall, score              | 0.573   | 0.071, 1.076    | .025 | 0.708   | 0.108, 1.308     | .021 |
|                              | Word list recognition, score         | 0.599   | 0.141, 1.056    | .010 | 0.510   | -0.037, 1.057    | .068 |
|                              | Trail making test A, s               | -12.593 | -21.061, -4.125 | .004 | -26.580 | -42.417, -10.744 | .001 |
|                              | Digit span forward, score            | 0.230   | -0.128, 0.588   | .207 | 0.271   | -0.154, 0.695    | .211 |
|                              | Digit span backward, score           | 0.256   | -0.001, 0.513   | .051 | 0.100   | -0.192, 0.391    | .391 |
|                              | Frontal Assessment Battery, score    | 1.289   | 0.673, 1.904    | .000 | 1.101   | 0.347, 1.854     | .004 |

Notes: Model 3: Adjusted for age and education, smoking status, alcohol intake, Mini Nutritional Assessment Screening score ( $\leq 11$ ), low physical activity, body mass index, number of comorbidities, depressive symptoms, and self-reported health status (good vs. poor).

*B* = unstandardized coefficients using multiple linear regression.

<sup>a</sup>Percentage body fat was determined as total fat mass divided by total body mass by dual-energy X-ray absorptiometry.
